# Supplementary material for: Effect of icaritin on autophagy-related protein expression in TDP-43-transfected SH-SY5Y cells
Source: PeerJ. 2022 Jul 4;10:e13703. doi: 10.7717/peerj.13703 (PMC9261921; doi:10.7717/peerj.13703)
Supplement: Supplemental Information 2 [file peerj-10-13703-s002.xlsx]

## Sheet: Sheet1
Figure 1 Establishment and verification of TDP-43 transfected SH-SY5Y cell model
(C) Changes in cell viability after 8, 10, 12, 14, and 16 h after TDP-43 transfection
	Con					TDP-43
8 h	109.42	103.8	98.59	103.87	84.32	101	93	98	100	122
10 h	108.52	94.4	100.08	93.35	103.65	99	93	96	95	105
12 h	114.85	107.12	86.69	96.63	94.7	72	71	69	69	75
14 h	106.38	97.75	101.86	99.56	94.45	51	45	43	50	45
16 h	100.15	102.66	100.96	99.74	96.5	30	43	37	35	37
(D) mRNA expression of TDP-43 in SH-SY5Y cells transfected with TDP-43
Con	TDP-43
1.43045	2019.1
1.44804	2736.03
0.774788	2000.19
1.48663	2758.46
(E) Levels of TDP-43 in SH-SY5Y cells transfected with TDP-43.
Con	TDP-43
0.990268	1.41117
1.04443	1.357
0.9653	1.43613
FIG. 2 The optimal concentration and duration of ICT and the effect of ICT on cell viability of TDP-43 model.
(A) Changes in cell viability at different concentrations of ICT and different time
	Con					0.1 μmol/L					1.0 μmol/L					10.0 μmol/L
12 h	97	92	108	103	100	82	84	77	80	80	102	99	122	114	110	74	72	66	70	70
24 h	91	94	109	99	102	99	108	121	111	116	122	119	132	123	127	110	102	116	109	113
48 h	95	99	109	103	95	119	113	123	114	112	138	136	161	152	147	114	108	127	133	120
(B) Changes in cell viability in the TDP-43-SH-SY5Y model after ICT intervention
Con	TDP-43	Con+ICT	TDP-43+ICT
107	82	115	90
103	79	98	100
84	67	95	79
98	72	102	82
89	69	84	83
FIG. 3 Levels of LC3 II/I, Caspase-3, Beclin-1, TDP-43, and p62 in TDP-43 transfected SH-SY5Y cells after ICT treatment.
(B) LC3 II/I
Con	TDP-43	Con+ICT	TDP-43+ICT
0.893195	1.39186	0.814389	1.12001
1.13734	1.61076	0.904042	1.27449
1.11734	1.50138	0.948633	1.21176
(C) cleaved Caspase-3
Con	TDP-43	Con+ICT	TDP-43+ICT
0.940884	1.46886	1.07897	1.02437
1.02076	1.38312	1.09477	1.01354
1.03836	1.39982	1.07942	0.995036
(D) Beclin-1
Con	TDP-43	Con+ICT	TDP-43+ICT
0.90242	1.22326	0.923833	0.727448
0.918628	1.1773	0.755332	0.843114
1.05039	1.01587	1.07013	0.688799
(E) TDP-43
Con	TDP-43	Con+ICT	TDP-43+ICT
1.03	0.79	0.98	0.9
0.98	0.72	0.95	0.82
0.89	0.69	1.02	0.83
(F) p62
Con	TDP-43	Con+ICT	TDP-43+ICT
1.15288	0.75274	1.08695	1.28291
0.794859	0.609675	0.824818	1.95005
1.05226	0.828523	1.06035	1.7667
